# Supplementary material for: Different adjuvanted pediatric HIV envelope vaccines induced distinct plasma antibody responses despite similar B cell receptor repertoires in infant rhesus macaques
Source: PubMed Central journal article supplement (PMC8719683; doi:10.1371/journal.pone.0256885), 2021-12-31
Supplement: pone.0256885.s005.pdf [file pone.0256885.s005.pdf]

**S1 Table. Immunogenetic characteristics of isolated envelope (Env)-reactive mAbs of Env-vaccinated infant monkeys based on human immunoglobulin database analysis.** A total of 39 pairs of potentially Env-reactive mAbs were isolated from the four vaccination groups across several anatomic compartments. Frequency of gene usage, percent somatic hypermutation, and complementarity-region 3 (CDR3) length are displayed for the heavy and light chains for each mAb along with the isotype and epitope specificity.

| Animal ID | Group             | Tissue             | IgH ID  | V <sub>H</sub> gene | D <sub>H</sub> gene | J <sub>H</sub> gene | HC % SHM | HC CDR3 length | Ig Isotype | IgL ID  | V <sub>L</sub> /V <sub>K</sub> gene | J <sub>L</sub> /J <sub>K</sub> gene | Specificity      |
|-----------|-------------------|--------------------|---------|---------------------|---------------------|---------------------|----------|----------------|------------|---------|-------------------------------------|-------------------------------------|------------------|
| 45521     | HIV Env+adjuvant  | Spleen             | H020465 | 4-4*07              | 2-OF15*2/inv        | 3*01                | 5.31     | 23             | IgG        | K020382 | 1-33*01                             | 2*03                                | Undetermined     |
| 45521     | HIV Env+adjuvant  | Retropharyngeal LN | H914640 | 4-4*07              | 3-3*01              | 3*01                | 6.14     | 23             | IgA        | K907482 | 1-33*01                             | 2*03                                | Undetermined     |
| 45521     | HIV Env+adjuvant  | Retropharyngeal LN | H914648 | 4-4*07              | 3-3*01              | 3*01                | 6.65     | 23             | IgG        | K907485 | 1-33*01                             | 2*03                                | Undetermined     |
| 45521     | HIV Env+adjuvant  | Retropharyngeal LN | H914649 | 4-4*07              | 5-12*01             | 3*01                | 5.88     | 23             | IgG        | K907486 | 1-33*01                             | 2*03                                | Undetermined     |
| 45522     | HIV Env+adjuvant  | Spleen             | H020414 | 4-61*03             | 6-13*01             | 4*02                | 10.03    | 13             | IgG        | L020264 | 1-51*02                             | 3*02                                | Undetermined     |
| 45083     | Coadministration  | Spleen             | H020400 | 4-59*01             | 6-19*01             | 4*02                | 6.17     | 13             | IgM        | L020253 | 1-40*01,02                          | 2*01                                | V1V2             |
| 45083     | Coadministration  | Mediastinal LN     | H020405 | 4-59*01,02          | 3-16*01,02          | 4*02                | 4.52     | 17             | IgG        | K020331 | 1D-16*01                            | 2*03,04                             | V1V2             |
| 45083     | Coadministration  | Mediastinal LN     | H020405 | 4-59*01,02          | 3-16*01,02          | 4*02                | 4.52     | 17             | IgG        | L020258 | 2-23*02                             | 1*01                                | V3               |
| 45083     | Coadministration  | Mediastinal LN     | H020407 | 4-b*02              | 5-12*01             | 4*02                | 8.41     | 13             | IgG        | L020260 | 2-8*01                              | 1*01                                | V3               |
| 45083     | Coadministration  | Mediastinal LN     | H020408 | 4-39*06             | 1-26*01             | 4*02                | 6.38     | 13             | IgG        | L020260 | 2-8*01                              | 1*01                                | Undetermined     |
| 45091     | Coadministration  | Axillary LN        | H020381 | 3-73*01,02          | 2-2*02/inv          | 6*02                | 10.15    | 14             | IgG        | L020241 | 11-55*01                            | 2*01                                | Undetermined     |
| 45091     | Coadministration  | Axillary LN        | H020387 | 4-59*01             | 4-4*01              | 4*02                | 4.74     | 17             | IgG        | K020324 | 1-39*01                             | 4*01                                | V3               |
| 45435     | Extended Interval | Mediastinal LN     | H020422 | 4-59*01             | 3-3*01,02           | 3*01,02             | 6.19     | 18             | IgA        | K020341 | 1-13*02                             | 4*01                                | V1V2             |
| 45435     | Extended Interval | Mediastinal LN     | H020425 | 4-59*01,02          | 3-OR15*3            | 5*01,02             | 7.63     | 16             | IgG        | K020344 | 1-33*01                             | 2*03                                | CD4 binding site |
| 45435     | Extended Interval | Mediastinal LN     | H020426 | 3-72*01             | 1-OR15*1            | 6*02                | 8.30     | 14             | IgM        | L020282 | 11-55*01                            | 2*01                                | V3               |
| 45435     | Extended Interval | Mediastinal LN     | H020430 | 3-11*01             | 1-7*01/inv          | 5*01                | 10.61    | 17             | IgG        | K020348 | 1/OR2-0*01                          | 2*03                                | V1V2             |
| 45435     | Extended Interval | Mediastinal LN     | H020431 | 3-64*02             | 4-17*01             | 5*01                | 9.40     | 12             | IgG        | K020349 | 3-11*01                             | 1*01                                | V1V2             |
| 45435     | Extended Interval | Mediastinal LN     | H020445 | 4-4*02              | 4-4*01              | 4*02                | 6.53     | 16             | IgG        | K020359 | 1D-16*01                            | 2*03                                | V3               |
| 45435     | Extended Interval | Mediastinal LN     | H020420 | 4-61*05             | 6-13*01             | 4*02                | 11.08    | 16             | IgG        | L020280 | 5-39*01                             | 2*01                                | V3               |
| 45435     | Extended Interval | Spleen             | H020461 | 3-73*01,02          | 2-15*01             | 4*02                | 9.65     | 17             | IgG        | K020380 | 1-12*01,02                          | 2*03                                | Undetermined     |
| 45441     | Extended Interval | Spleen             | H020449 | 3-21*01,02          | 1-IR1*01            | 1*01                | 6.05     | 29             | IgG        | K020361 | 1D-16*01                            | 1*01                                | Undetermined     |
| 45441     | Extended Interval | Spleen             | H020452 | 4-59*01             | 3-3*01              | 4*02                | 7.18     | 18             | IgG        | L020292 | 1-51*02                             | 7*01                                | CD4 binding site |
| 45441     | Extended Interval | Spleen             | H020450 | 3-21*01,02          | 3-22*01             | 1*01                | 7.14     | 15             | IgG        | L020290 | 3-21*01                             | 6*01                                | Undetermined     |
| 45441     | Extended Interval | Submental LN       | H914598 | 4-59*01             | 3-3*01              | 6*02                | 7.41     | 18             | IgA        | K907464 | 2-28*01                             | 1*01                                | Undetermined     |
| 45838     | 3M-052-SE         | PBMC               | H020493 | 3-43*02             | 6-13*01             | 4*02                | 5.31     | 10             | IgG        | L020321 | 3-19*01                             | 2*01                                | Undetermined     |
| 45840     | 3M-052-SE         | PBMC               | H020481 | 4-61*01,08          | 3-3*01,02           | 4*02                | 6.32     | 13             | IgG        | K020401 | 2-30*01                             | 1*01                                | V3               |
| 45840     | 3M-052-SE         | PBMC               | H020485 | 4-39*06             | 3-3*01,02           | 4*02                | 6.12     | 13             | IgG        | K020402 | 2-40*01                             | 1*01                                | V3               |
| 45840     | 3M-052-SE         | PBMC               | H020488 | 3-43*02             | 6-13*01             | 4*02                | 4.77     | 10             | IgG        | K020402 | 2-40*01                             | 1*01                                | Undetermined     |
| 45851     | 3M-052-SE         | PBMC               | H020495 | 3-15*08             | 0-IR*01C            | 3*01                | 7.03     | 11             | IgG        | K020407 | 2-40*01                             | 1*01                                | Undetermined     |
| 45851     | 3M-052-SE         | PBMC               | H020494 | 4-39*06             | 3-3*01,02           | 4*02                | 6.89     | 13             | IgG        | K020409 | 2-30*01                             | 1*01                                | Undetermined     |
| 45851     | 3M-052-SE         | PBMC               | H020500 | 4-59*01             | 6-13*01             | 1*01                | 4.21     | 10             | IgA        | L020324 | 5-48*01                             | 1*01                                | V3               |
| 45851     | 3M-052-SE         | PBMC               | H020498 | 5-51*01             | 3-10*01             | 5*01                | 4.15     | 13             | IgG        | L020327 | 1-50*01                             | 2*01                                | V3               |
| 45851     | 3M-052-SE         | PBMC               | H020499 | 3-43*02             | 2-8*02              | 4*02                | 5.61     | 16             | IgG        | L020326 | 6-57*01                             | 7*01                                | Undetermined     |
| 45851     | 3M-052-SE         | PBMC               | H020505 | 4-59*01             | 1-1*01              | 1*01                | 4.21     | 10             | IgM        | L020329 | 6-57*01                             | 7*01                                | V3               |
| 45851     | 3M-052-SE         | PBMC               | H020501 | 4-39*06             | 3-3*01,02           | 4*02                | 6.63     | 13             | IgG        | L020328 | 5-48*01                             | 1*01                                | V3               |
| 45851     | 3M-052-SE         | PBMC               | H020504 | 3-43*02             | 6-13*01             | 4*02                | 5.31     | 10             | IgG        | L020329 | 6-57*01                             | 7*01                                | Undetermined     |
| 45851     | 3M-052-SE         | PBMC               | H020506 | 4-39*06             | 3-3*01,02           | 1*01                | 6.38     | 13             | IgE        | L020333 | 6-57*01                             | 7*01                                | V3               |
| 45851     | 3M-052-SE         | PBMC               | H020496 | 3-43*02             | 2-8*02              | 4*02                | 5.57     | 16             | IgG        | K020407 | 2-40*01                             | 1*01                                | Undetermined     |
| 45851     | 3M-052-SE         | PBMC               | H020497 | 4-59*01             | 1-1*01              | 1*01                | 3.95     | 10             | IgG        | K020409 | 2-30*01                             | 1*01                                | V3               |
