# Supplementary material for: Different adjuvanted pediatric HIV envelope vaccines induced distinct plasma antibody responses despite similar B cell receptor repertoires in infant rhesus macaques
Source: PubMed Central journal article supplement (PMC8719683; doi:10.1371/journal.pone.0256885), 2021-12-31
Supplement: pone.0256885.s006.pdf [file pone.0256885.s006.pdf]

S1 Fig

A. HIV Env+adjuvant group, animal 45519, PBMC (W10), gating strategy: lymphocytes → Singlets (SSC or FSC) → Live-dead → CD14-CD16- → CD3-CD20+ → IgD-CD27all → 1086c.gp120 double positive

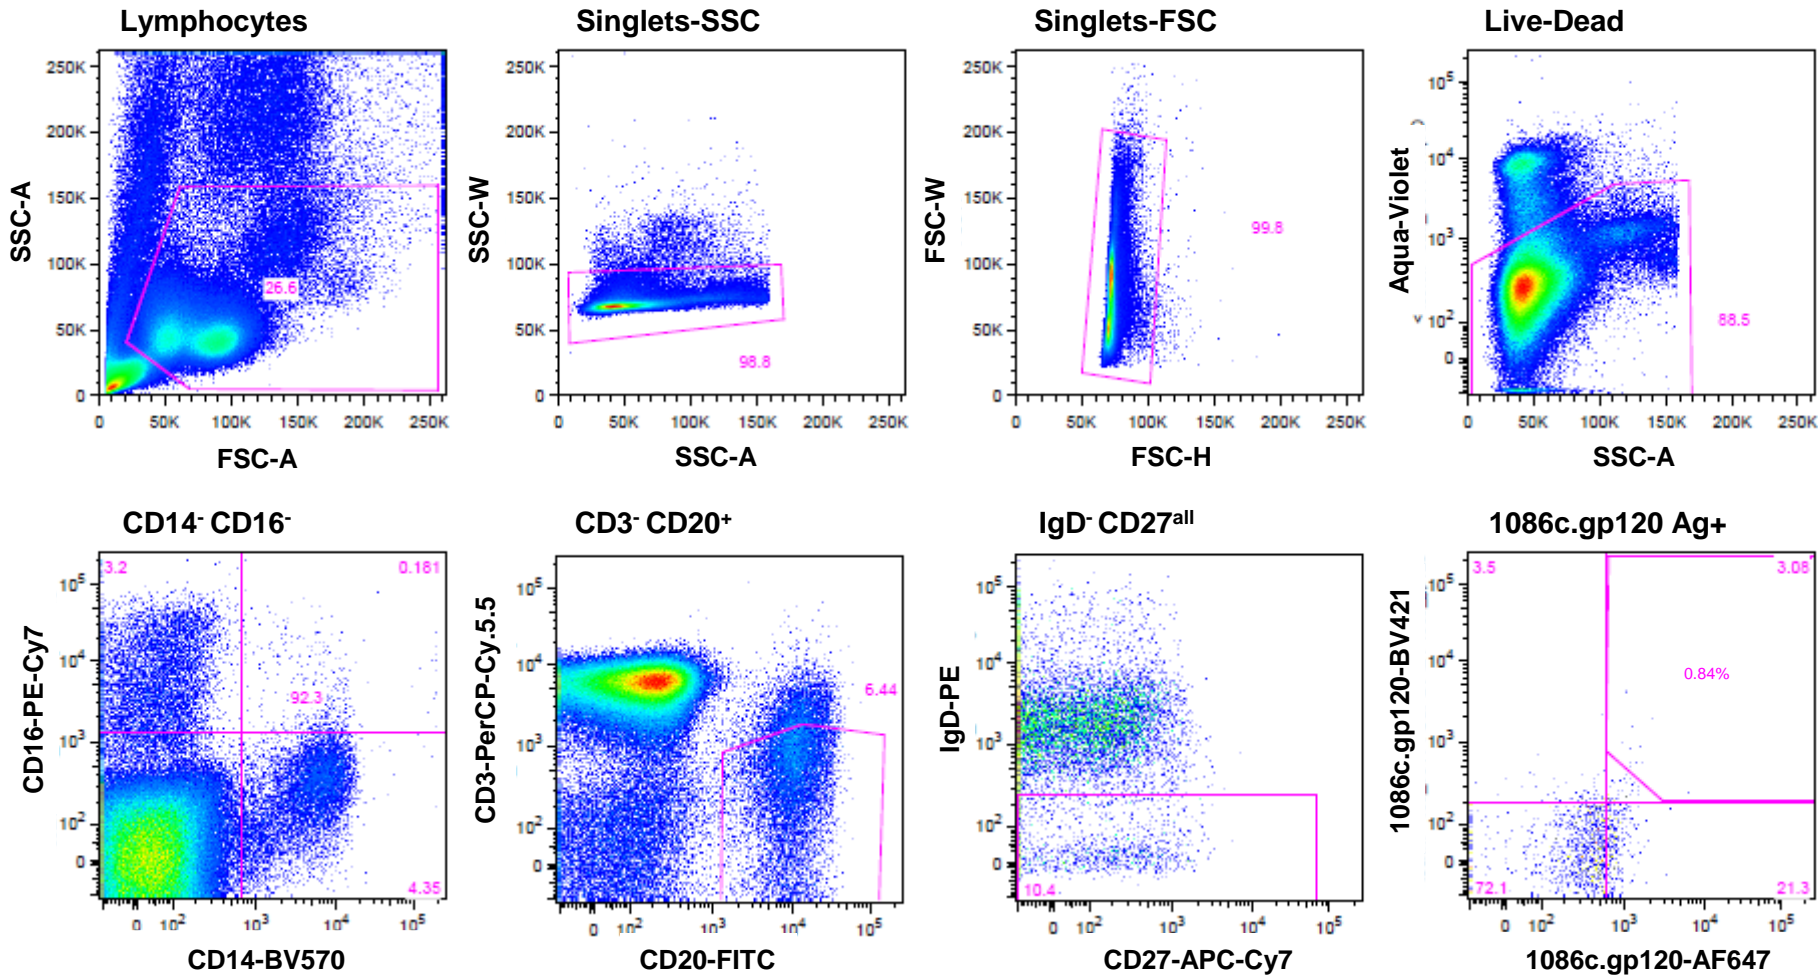

S1 Fig

B. HIV Env+adjuvant group, animal 45521, Spleen (necropsy), representative data of 2 independent sort, gating strategy: lymphocytes → Singlets (SSC or FSC) → Live-dead → CD14-CD16- → CD3-CD20+ → IgD-CD27all → 1086c.gp120 double positive

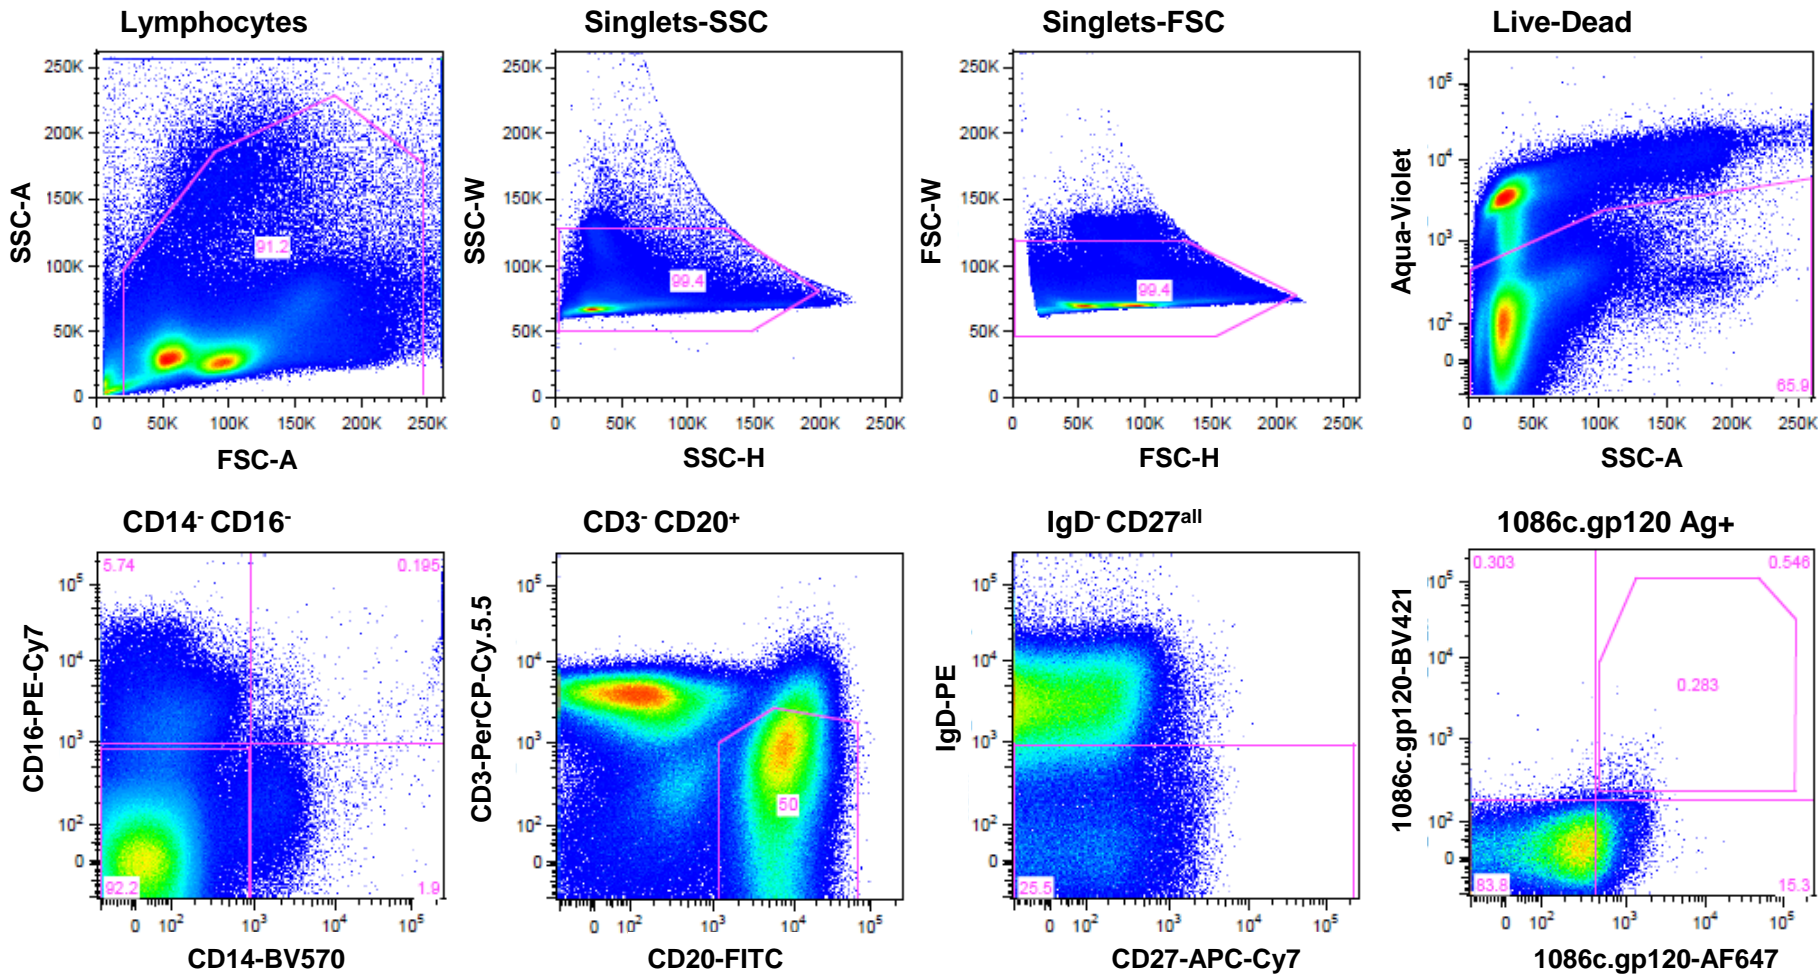

S1 Fig

C. HIV Env+adjuvant group, animal 45522, Oral LN (retropharengeal, necropsy), representative data of 3 independent sort, gating strategy: lymphocytes → Singlets (SSC or FSC) → Live-dead → CD14-CD16- → CD3-CD20+ → IgD-CD27all → 1086c.gp120 double positive

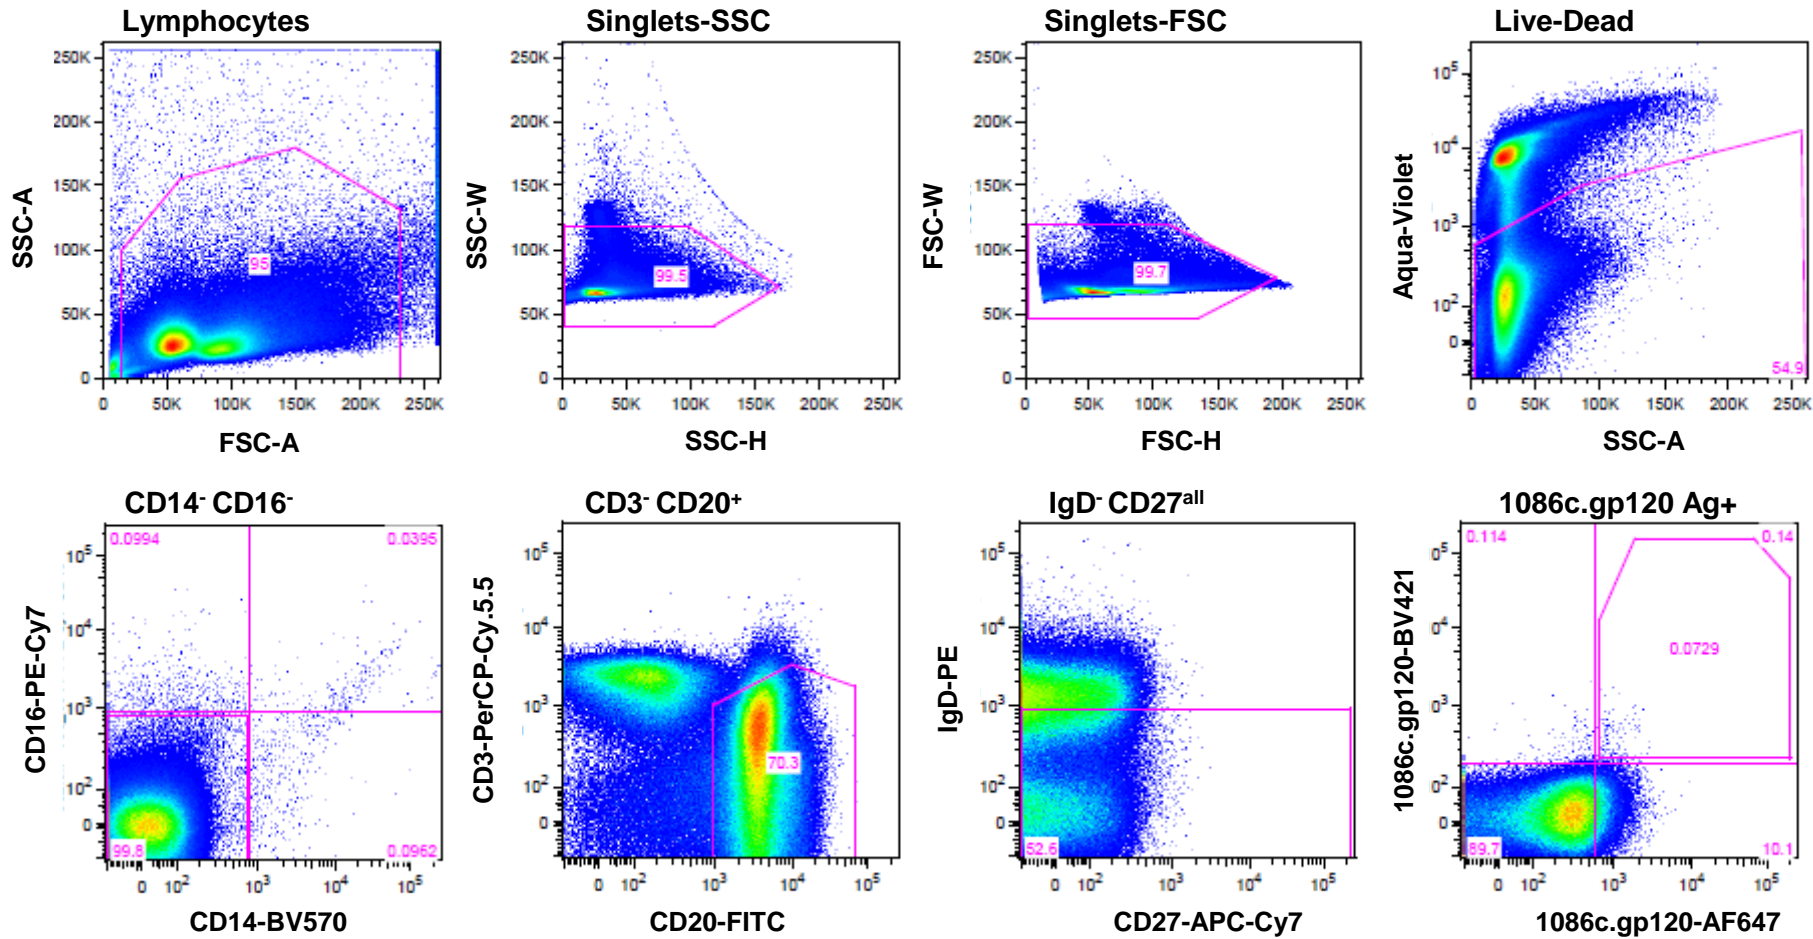

S1 Fig

D. Co-administration group, animal 45038, PBMC (W12), gating strategy: lymphocytes → Singlets (SSC or FSC) → Live-dead → CD14-CD16- → CD3-CD20+ → IgD-CD27all → 1086c.gp120 double positive

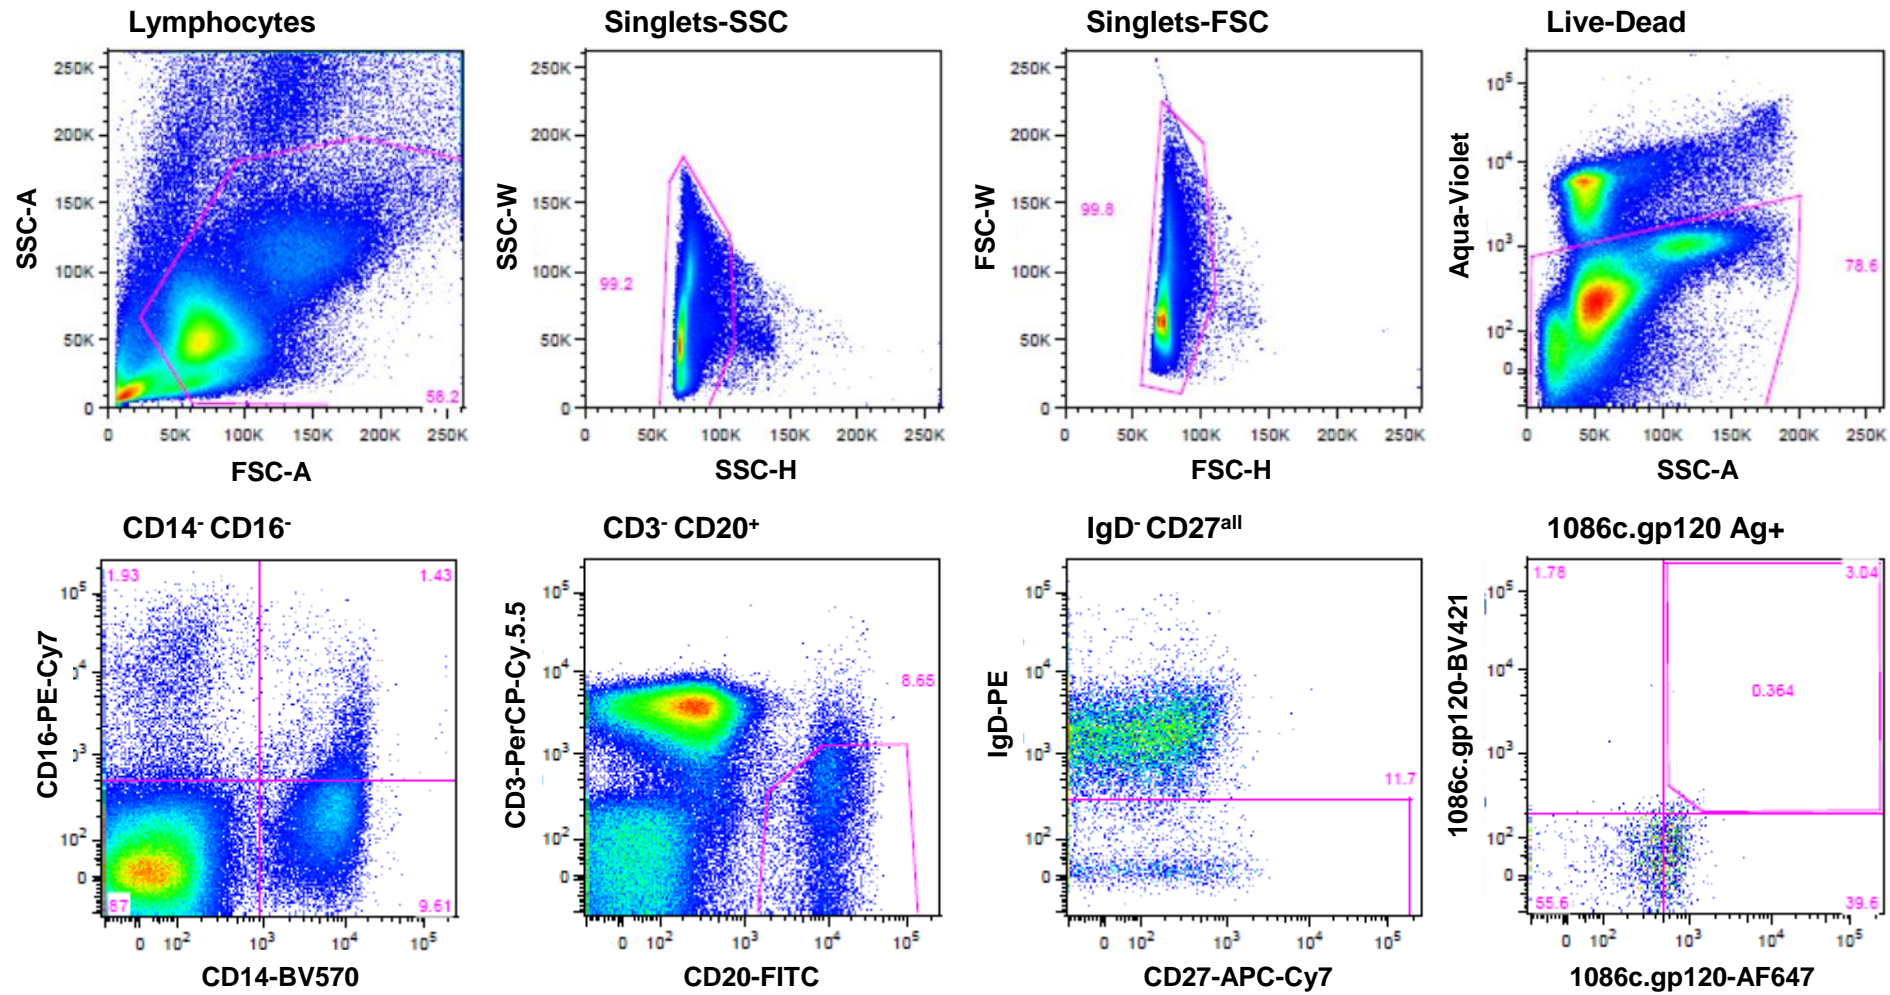



S1 Fig

E. Co-administration group, animal 45083, Spleen (necropsy), gating strategy: lymphocytes → Singlets (SSC or FSC) → Live-dead → CD14-CD16- → CD3-CD20+ → IgD-CD27all → 1086c.gp120 double positive

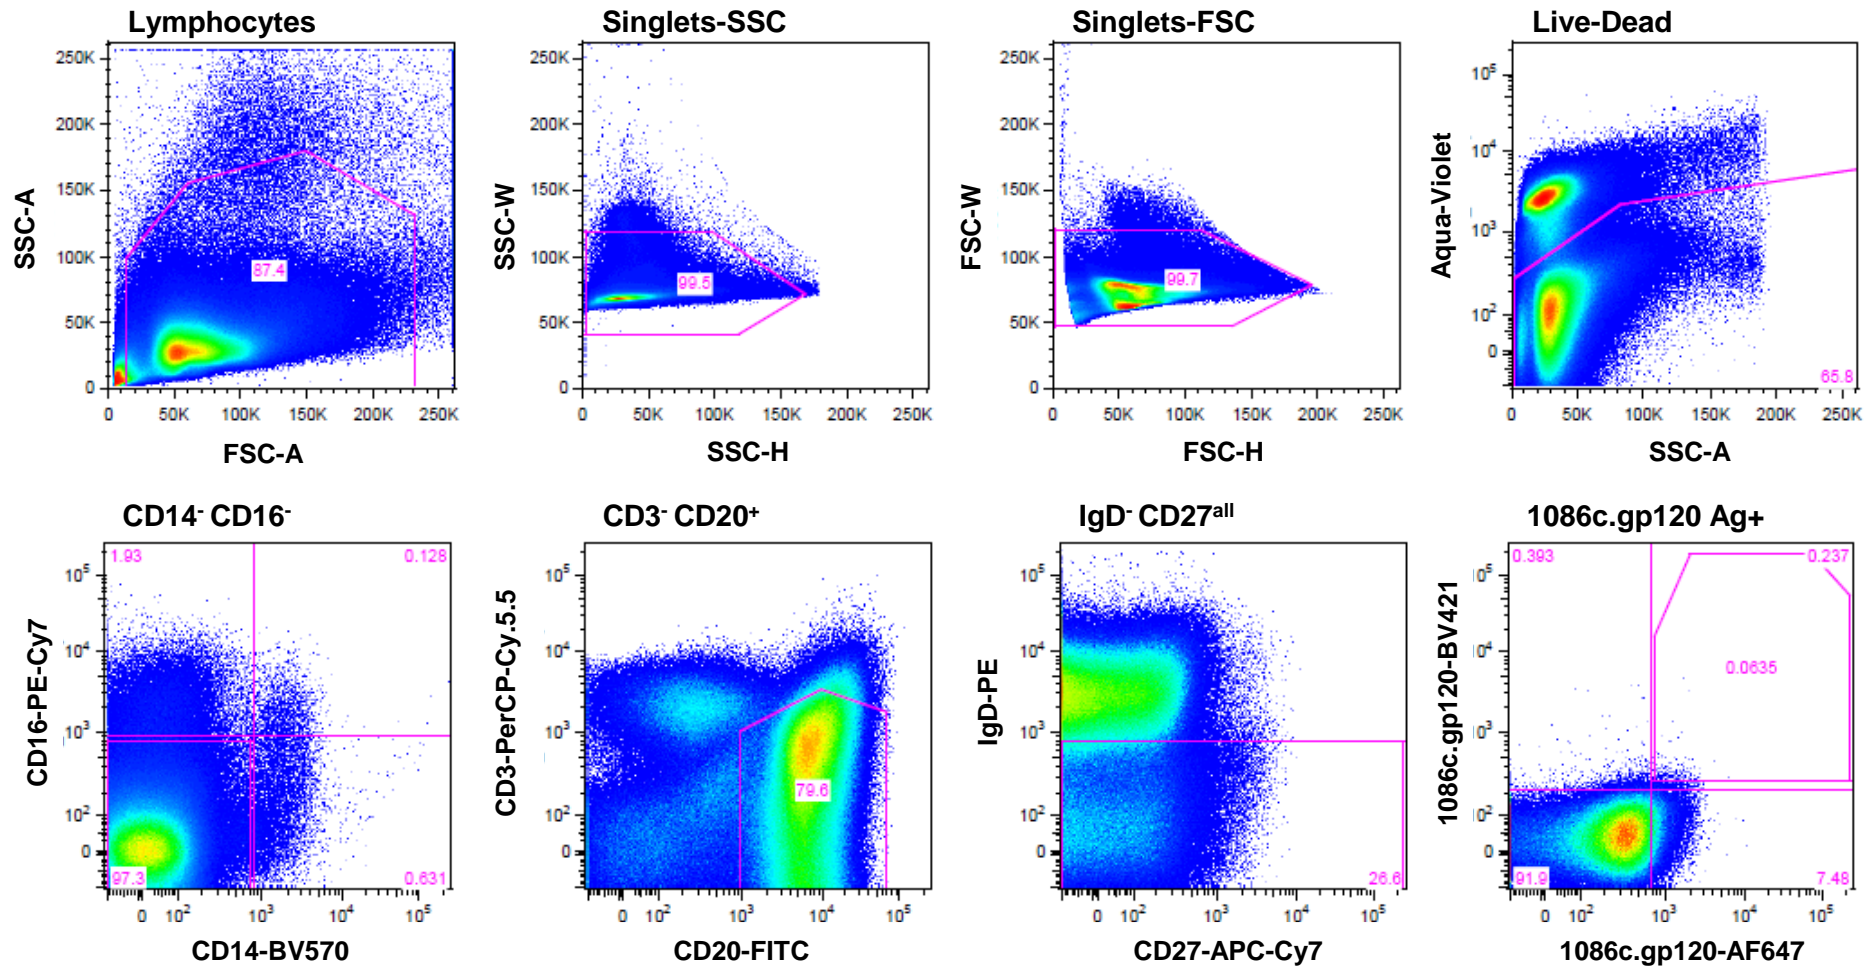

S1 Fig

F. Co-administration group, animal 45091, Axillary LN (necropsy), gating strategy: lymphocytes → Singlets (SSC or FSC) → Live-dead → CD14-CD16- → CD3-CD20+ → IgD-CD27all → 1086c.gp120 double positive

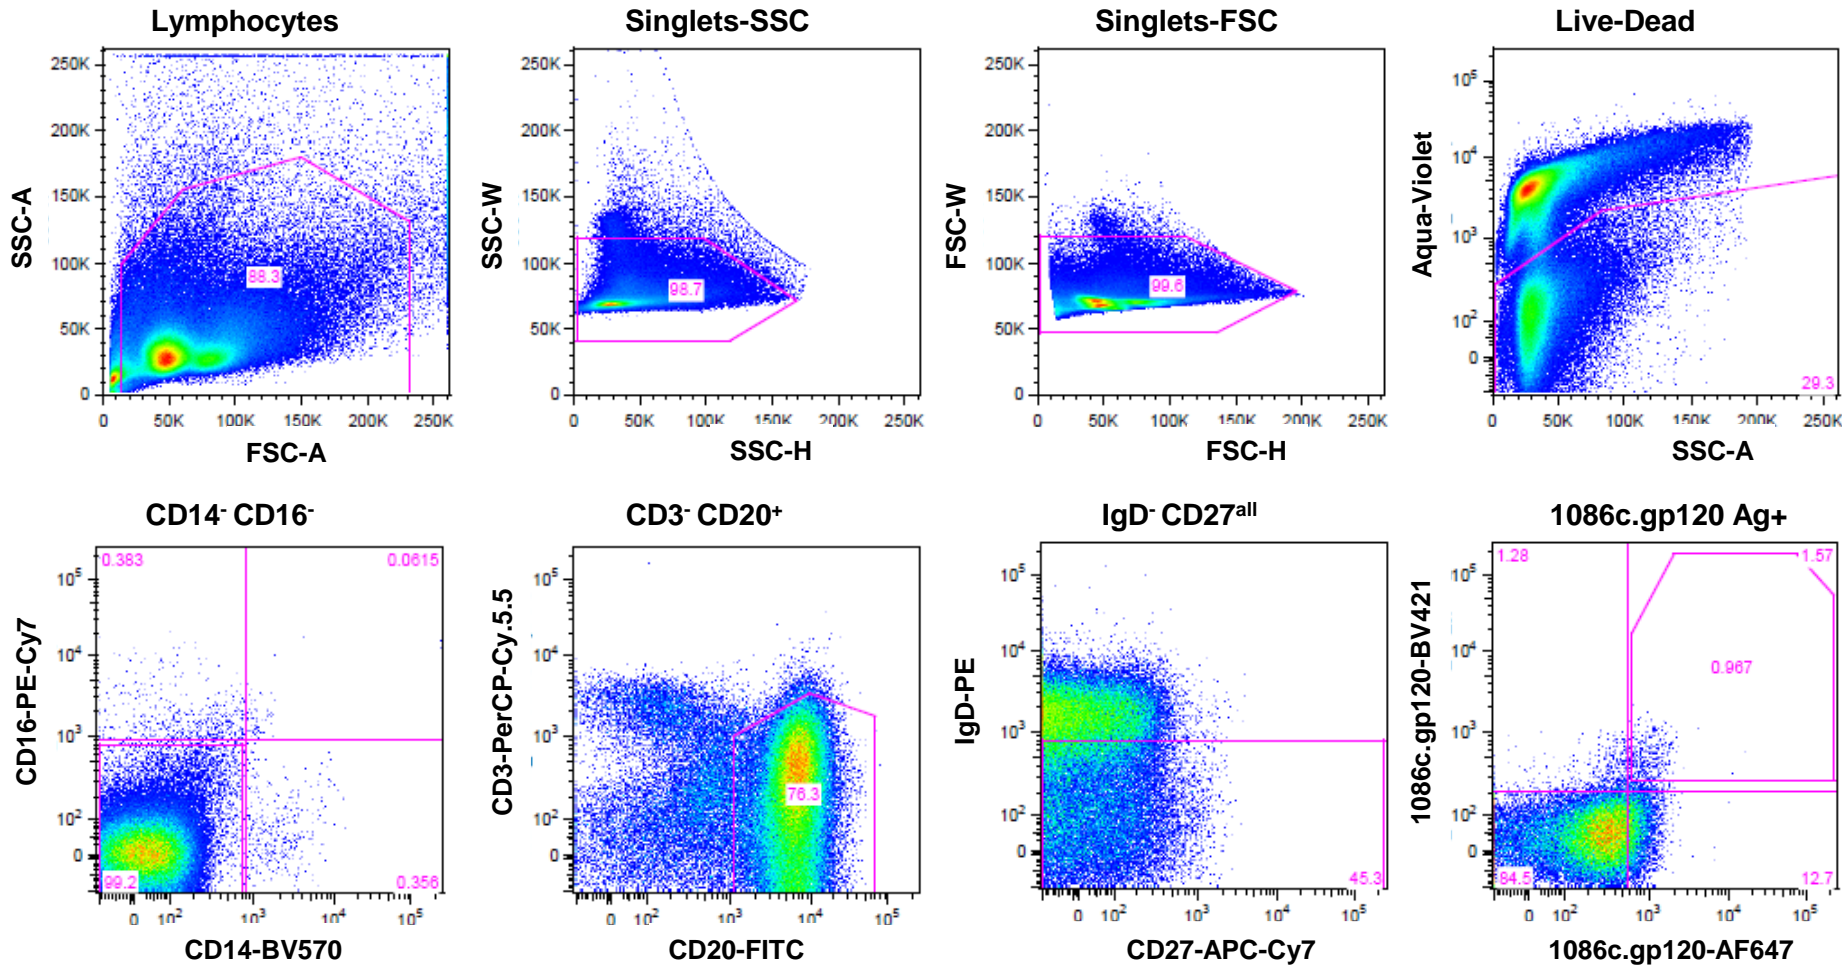

S1 Fig

G. Extended Interval group, animal 45435, Spleen (necropsy), representative data of 3 independent sort, gating strategy: lymphocytes → Singlets (SSC or FSC) → Live-dead → CD14-CD16- → CD3-CD20+ → IgD-CD27all → 1086c.gp120 double positive

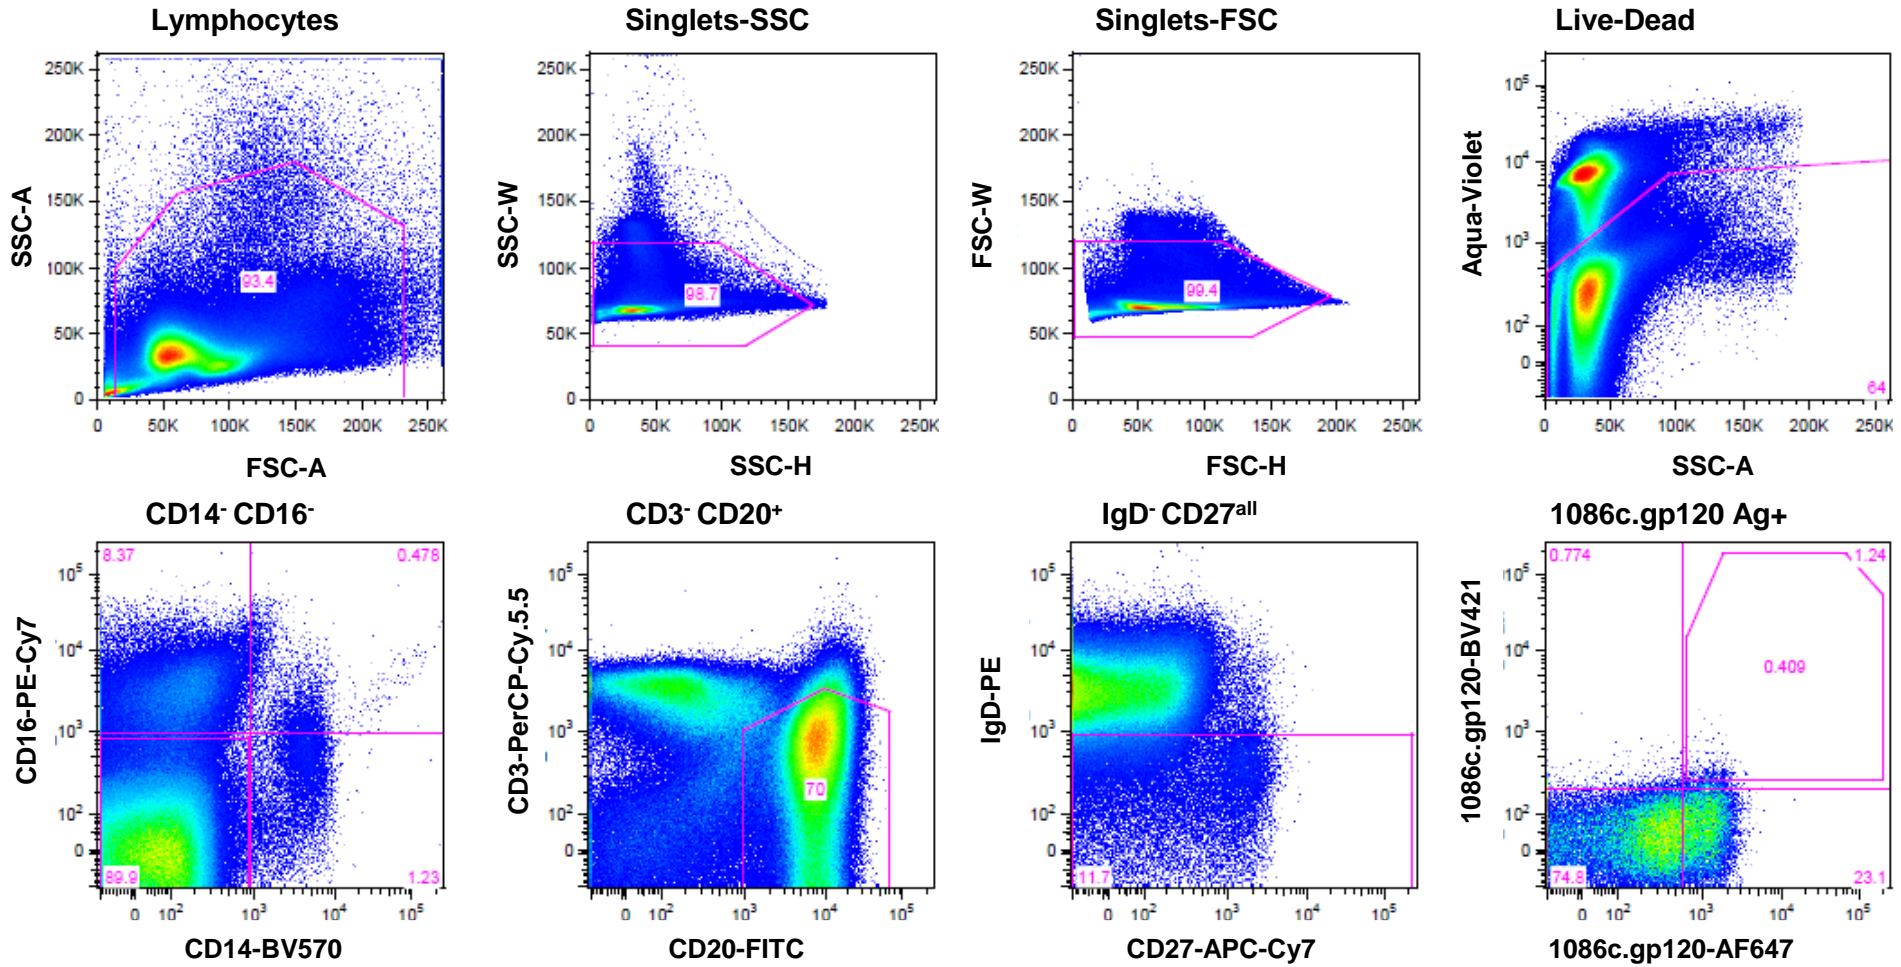

S1 Fig

H. Extended Interval group, animal 45441, Oral LN (submandibular, necropsy), representative data of 4 independent sort, gating strategy: lymphocytes → Singlets (SSC or FSC) → Live-dead → CD14-CD16- → CD3-CD20+ → IgD-CD27all → 1086c.gp120 double positive

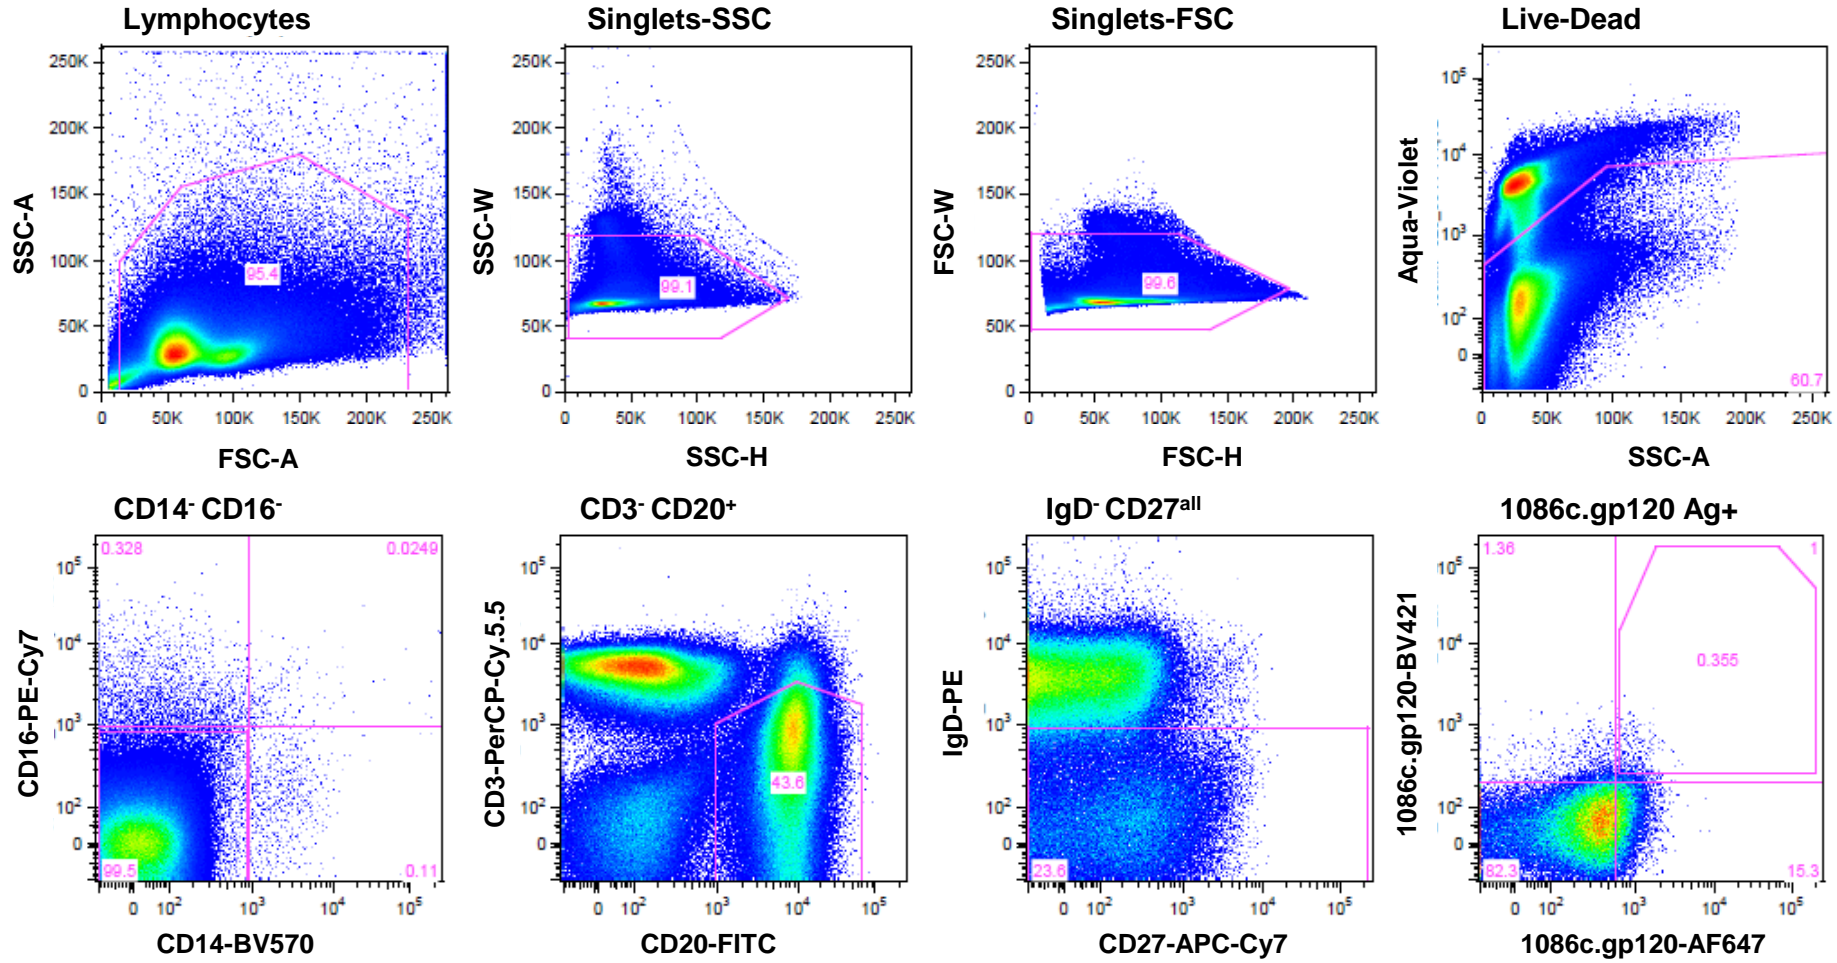



S1 Fig

I. Extended Interval group, animal 45448, Colon (necropsy), representative data of 3 independent sort, gating strategy: lymphocytes → Singlets (SSC or FSC) → Live-dead → CD14-CD16- → CD3-CD20+ → IgD-CD27all → 1086c.gp120 double positive

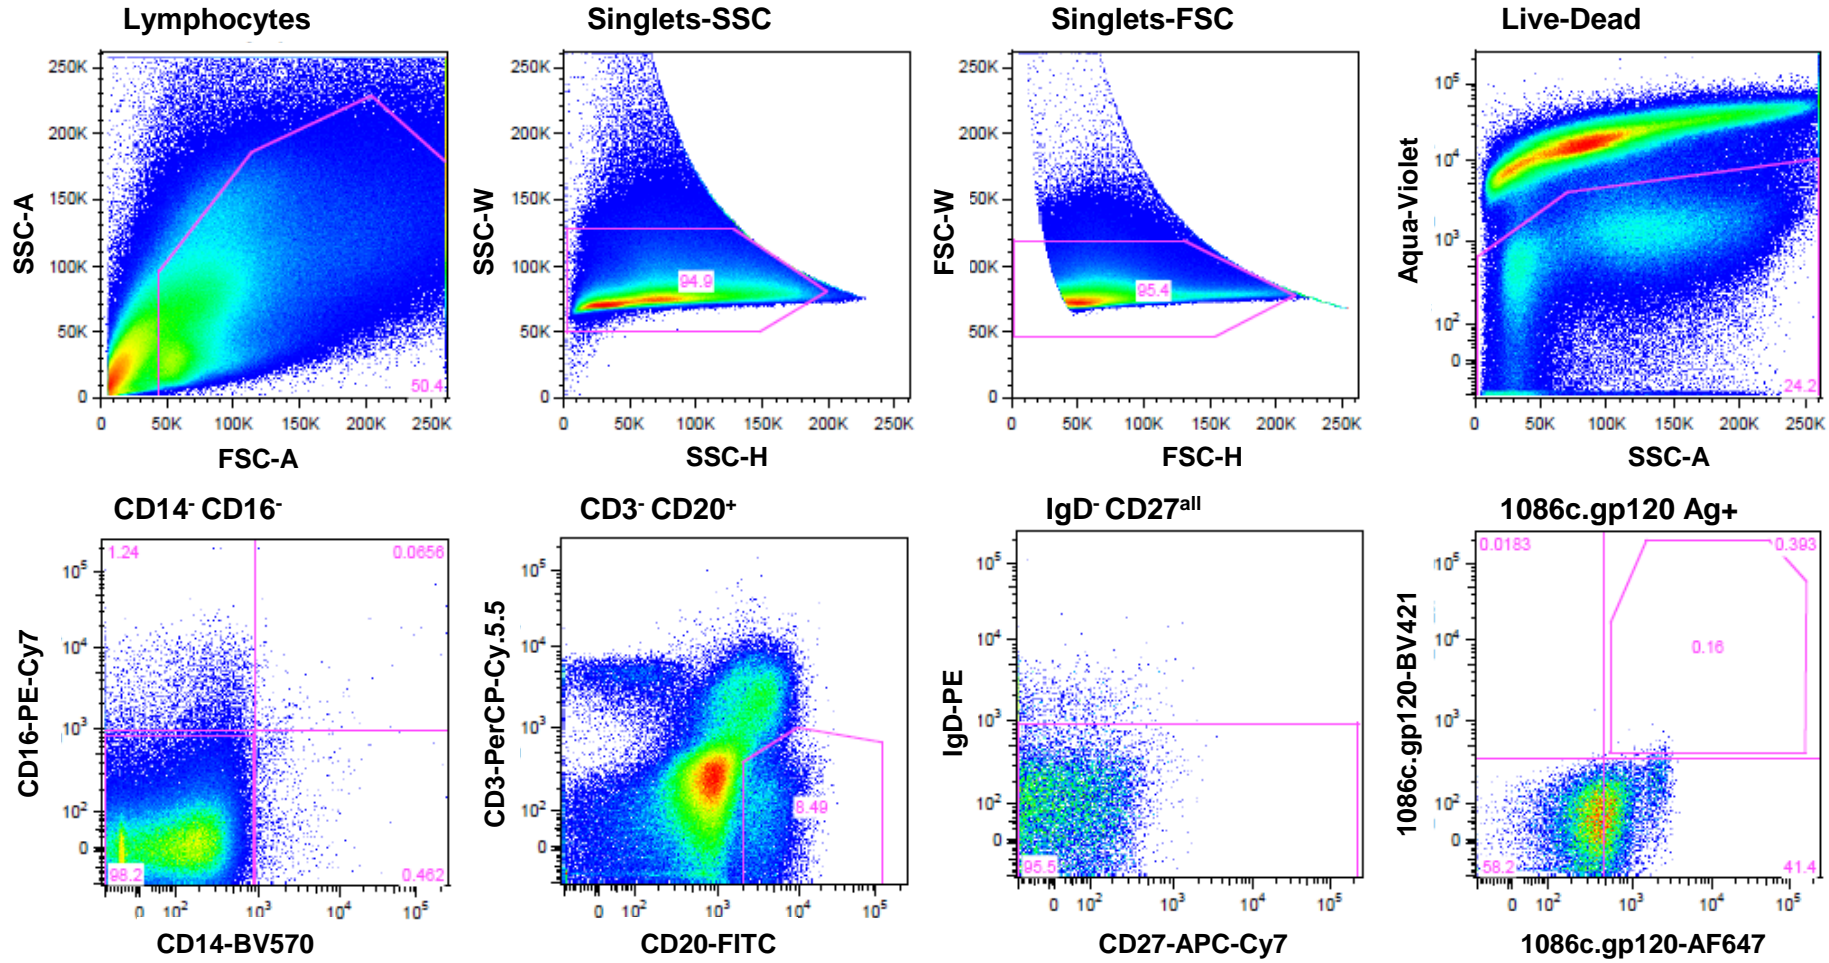

S1 Fig

J. 3M-052-SE group, animal 45838, PBMC (W12), gating strategy: lymphocytes → Singlets (SSC or FSC) → Live-dead → CD14-CD16- → CD3-CD20+ → IgD-CD27all → 1086c.gp120 double positive

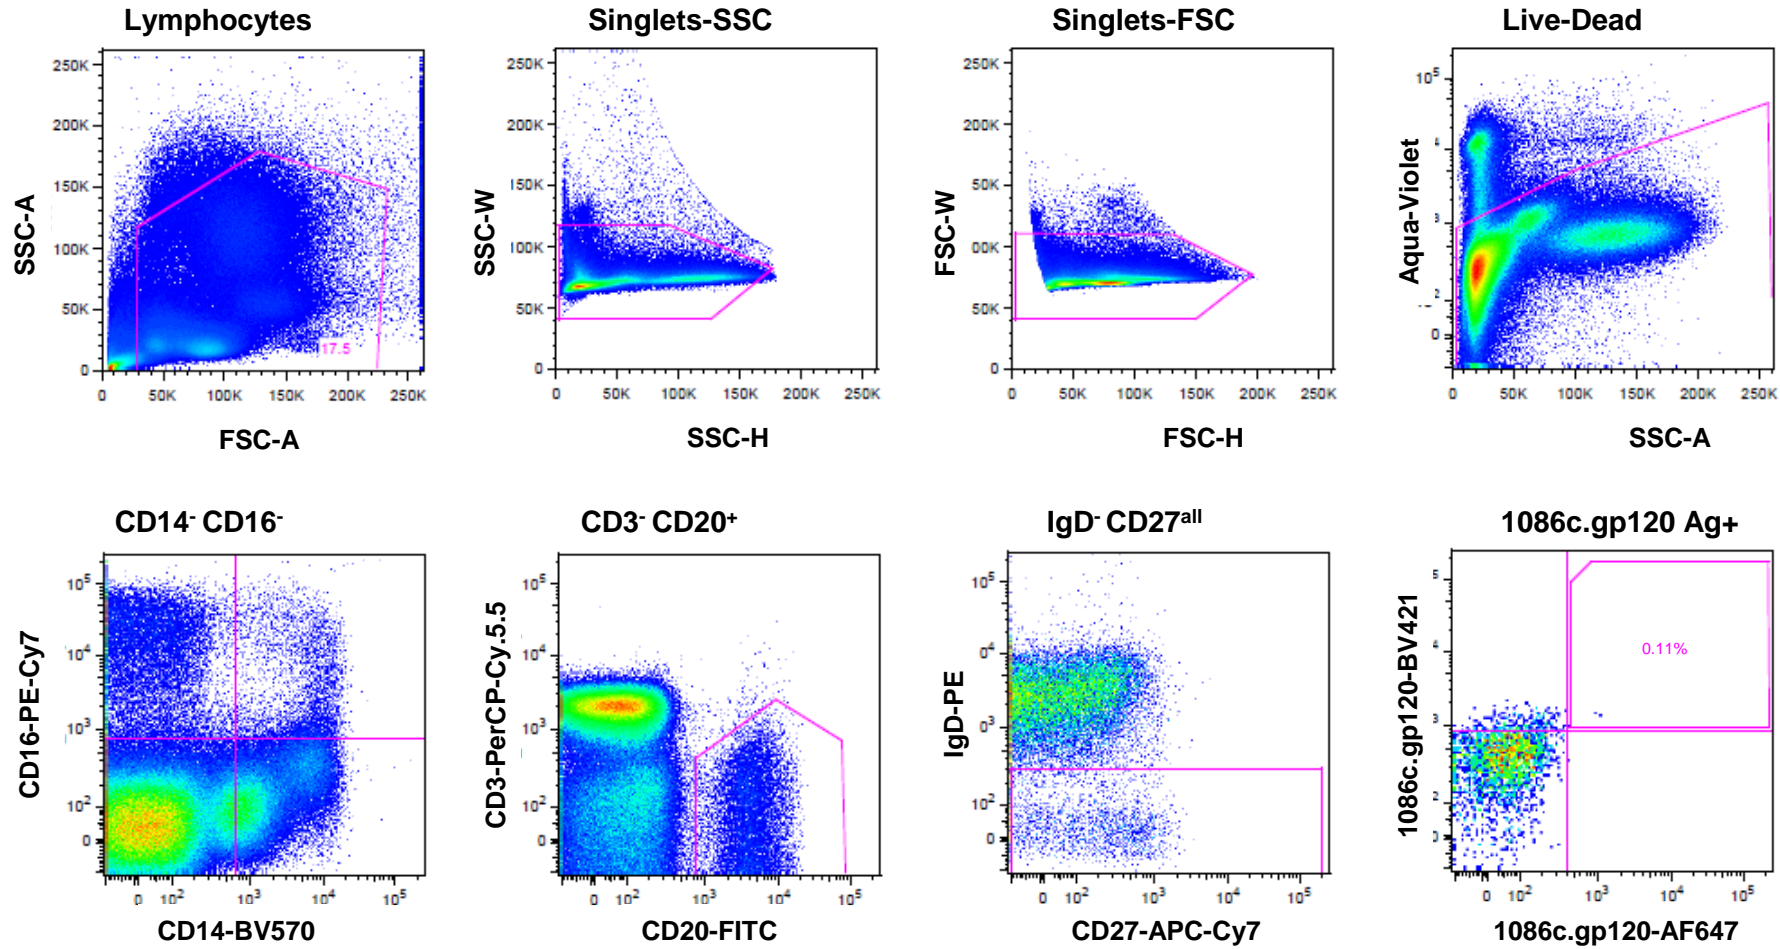

**S1 Fig 1A-J. Representative flow cytometry analyses for single cell HIV Env-specific memory B cell sorting from PBMC and tissues of infants by vaccination groups.** Percentage of memory B cells (CD20+CD27+IgD-), which were reactive to HIV 1086c gp120 K160N tagged with two colors-BV421 and AF647 (double positive cells) indicated in the upper right quadrant. Gates were drawn based on isotype controls and fluorescent minus one (FMO) controls.

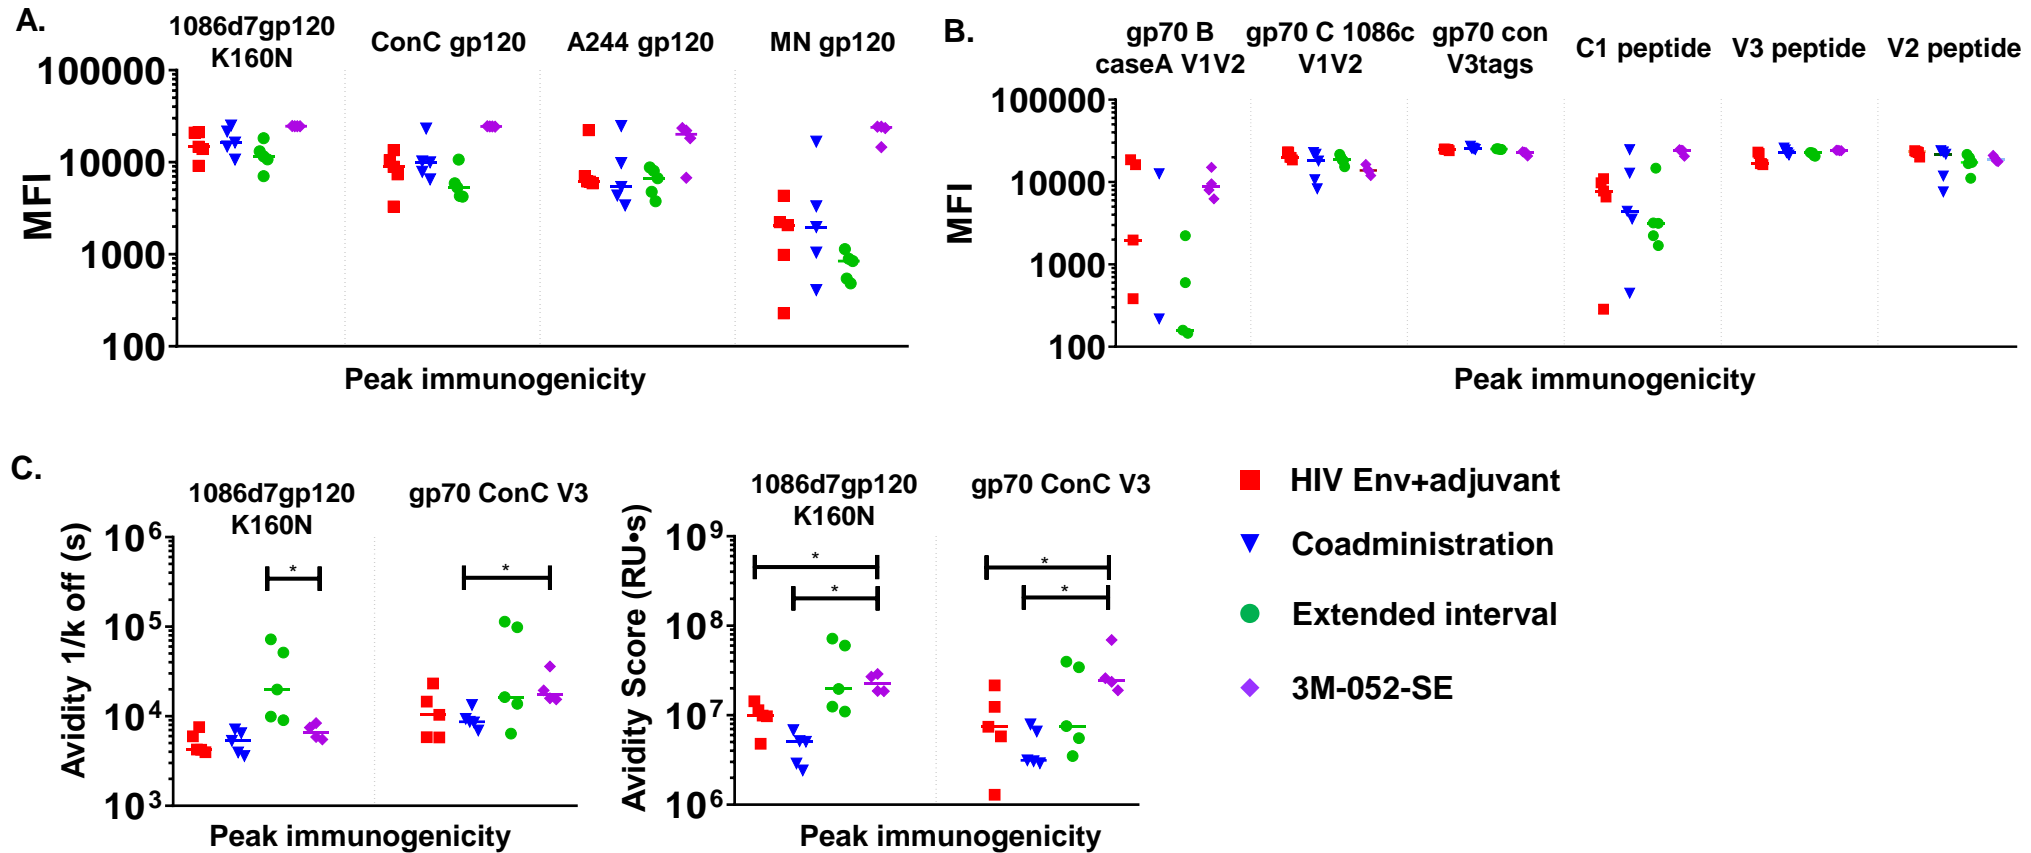

**S2 Fig. Characterization of vaccination-induced plasma envelope IgG responses in infant rhesus macaques.** (A) Cross clade HIV gp120-specific IgG responses at peak immunogenicity by luminex assay (BAMA). (B) Variable and conserved epitopes-specific IgG responses at peak immunogenicity by BAMA. (C) The 3M-052 group antibody responses had higher avidity strength against most of the tested antigens. Avidity 1/k off (the inverse of the dissociation rate) was plotted as a measure of the strength of binding and avidity scores which take into consideration the magnitude are also shown. Statistical analyses were performed with GraphPad Prism, \* denoted significant p-values of <0.05 by a non-parametric Mann-Whitney test.



**S1 Table. Immunogenetic characteristics of isolated envelope (Env)-reactive mAbs of Env-vaccinated infant monkeys based on human immunoglobulin database analysis.** A total of 39 pairs of potentially Env-reactive mAbs were isolated from the four vaccination groups across several anatomic compartments. Frequency of gene usage, percent somatic hypermutation, and complementarity-region 3 (CDR3) length are displayed for the heavy and light chains for each mAb along with the isotype and epitope specificity.

| Animal ID | Group             | Tissue             | IgH ID  | V <sub>H</sub> gene | D <sub>H</sub> gene | J <sub>H</sub> gene | HC % SHM | HC CDR3 length | Ig Isotype | IgL ID  | V <sub>L</sub> /V <sub>K</sub> gene | J <sub>L</sub> /J <sub>K</sub> gene | Specificity      |
|-----------|-------------------|--------------------|---------|---------------------|---------------------|---------------------|----------|----------------|------------|---------|-------------------------------------|-------------------------------------|------------------|
| 45521     | HIV Env+adjuvant  | Spleen             | H020465 | 4-4*07              | 2-OF15*2/inv        | 3*01                | 5.31     | 23             | IgG        | K020382 | 1-33*01                             | 2*03                                | Undetermined     |
| 45521     | HIV Env+adjuvant  | Retropharyngeal LN | H914640 | 4-4*07              | 3-3*01              | 3*01                | 6.14     | 23             | IgA        | K907482 | 1-33*01                             | 2*03                                | Undetermined     |
| 45521     | HIV Env+adjuvant  | Retropharyngeal LN | H914648 | 4-4*07              | 3-3*01              | 3*01                | 6.65     | 23             | IgG        | K907485 | 1-33*01                             | 2*03                                | Undetermined     |
| 45521     | HIV Env+adjuvant  | Retropharyngeal LN | H914649 | 4-4*07              | 5-12*01             | 3*01                | 5.88     | 23             | IgG        | K907486 | 1-33*01                             | 2*03                                | Undetermined     |
| 45522     | HIV Env+adjuvant  | Spleen             | H020414 | 4-61*03             | 6-13*01             | 4*02                | 10.03    | 13             | IgG        | L020264 | 1-51*02                             | 3*02                                | Undetermined     |
| 45083     | Coadministration  | Spleen             | H020400 | 4-59*01             | 6-19*01             | 4*02                | 6.17     | 13             | IgM        | L020253 | 1-40*01,02                          | 2*01                                | V1V2             |
| 45083     | Coadministration  | Mediastinal LN     | H020405 | 4-59*01,02          | 3-16*01,02          | 4*02                | 4.52     | 17             | IgG        | K020331 | 1D-16*01                            | 2*03,04                             | V1V2             |
| 45083     | Coadministration  | Mediastinal LN     | H020405 | 4-59*01,02          | 3-16*01,02          | 4*02                | 4.52     | 17             | IgG        | L020258 | 2-23*02                             | 1*01                                | V3               |
| 45083     | Coadministration  | Mediastinal LN     | H020407 | 4-b*02              | 5-12*01             | 4*02                | 8.41     | 13             | IgG        | L020260 | 2-8*01                              | 1*01                                | V3               |
| 45083     | Coadministration  | Mediastinal LN     | H020408 | 4-39*06             | 1-26*01             | 4*02                | 6.38     | 13             | IgG        | L020260 | 2-8*01                              | 1*01                                | Undetermined     |
| 45091     | Coadministration  | Axillary LN        | H020381 | 3-73*01,02          | 2-2*02/inv          | 6*02                | 10.15    | 14             | IgG        | L020241 | 11-55*01                            | 2*01                                | Undetermined     |
| 45091     | Coadministration  | Axillary LN        | H020387 | 4-59*01             | 4-4*01              | 4*02                | 4.74     | 17             | IgG        | K020324 | 1-39*01                             | 4*01                                | V3               |
| 45435     | Extended Interval | Mediastinal LN     | H020422 | 4-59*01             | 3-3*01,02           | 3*01,02             | 6.19     | 18             | IgA        | K020341 | 1-13*02                             | 4*01                                | V1V2             |
| 45435     | Extended Interval | Mediastinal LN     | H020425 | 4-59*01,02          | 3-OR15*3            | 5*01,02             | 7.63     | 16             | IgG        | K020344 | 1-33*01                             | 2*03                                | CD4 binding site |
| 45435     | Extended Interval | Mediastinal LN     | H020426 | 3-72*01             | 1-OR15*1            | 6*02                | 8.30     | 14             | IgM        | L020282 | 11-55*01                            | 2*01                                | V3               |
| 45435     | Extended Interval | Mediastinal LN     | H020430 | 3-11*01             | 1-7*01/inv          | 5*01                | 10.61    | 17             | IgG        | K020348 | 1/OR2-0*01                          | 2*03                                | V1V2             |
| 45435     | Extended Interval | Mediastinal LN     | H020431 | 3-64*02             | 4-17*01             | 5*01                | 9.40     | 12             | IgG        | K020349 | 3-11*01                             | 1*01                                | V1V2             |
| 45435     | Extended Interval | Mediastinal LN     | H020445 | 4-4*02              | 4-4*01              | 4*02                | 6.53     | 16             | IgG        | K020359 | 1D-16*01                            | 2*03                                | V3               |
| 45435     | Extended Interval | Mediastinal LN     | H020420 | 4-61*05             | 6-13*01             | 4*02                | 11.08    | 16             | IgG        | L020280 | 5-39*01                             | 2*01                                | V3               |
| 45435     | Extended Interval | Spleen             | H020461 | 3-73*01,02          | 2-15*01             | 4*02                | 9.65     | 17             | IgG        | K020380 | 1-12*01,02                          | 2*03                                | Undetermined     |
| 45441     | Extended Interval | Spleen             | H020449 | 3-21*01,02          | 1-IR1*01            | 1*01                | 6.05     | 29             | IgG        | K020361 | 1D-16*01                            | 1*01                                | Undetermined     |
| 45441     | Extended Interval | Spleen             | H020452 | 4-59*01             | 3-3*01              | 4*02                | 7.18     | 18             | IgG        | L020292 | 1-51*02                             | 7*01                                | CD4 binding site |
| 45441     | Extended Interval | Spleen             | H020450 | 3-21*01,02          | 3-22*01             | 1*01                | 7.14     | 15             | IgG        | L020290 | 3-21*01                             | 6*01                                | Undetermined     |
| 45441     | Extended Interval | Submental LN       | H914598 | 4-59*01             | 3-3*01              | 6*02                | 7.41     | 18             | IgA        | K907464 | 2-28*01                             | 1*01                                | Undetermined     |
| 45838     | 3M-052-SE         | PBMC               | H020493 | 3-43*02             | 6-13*01             | 4*02                | 5.31     | 10             | IgG        | L020321 | 3-19*01                             | 2*01                                | Undetermined     |
| 45840     | 3M-052-SE         | PBMC               | H020481 | 4-61*01,08          | 3-3*01,02           | 4*02                | 6.32     | 13             | IgG        | K020401 | 2-30*01                             | 1*01                                | V3               |
| 45840     | 3M-052-SE         | PBMC               | H020485 | 4-39*06             | 3-3*01,02           | 4*02                | 6.12     | 13             | IgG        | K020402 | 2-40*01                             | 1*01                                | V3               |
| 45840     | 3M-052-SE         | PBMC               | H020488 | 3-43*02             | 6-13*01             | 4*02                | 4.77     | 10             | IgG        | K020402 | 2-40*01                             | 1*01                                | Undetermined     |
| 45851     | 3M-052-SE         | PBMC               | H020495 | 3-15*08             | 0-IR*01C            | 3*01                | 7.03     | 11             | IgG        | K020407 | 2-40*01                             | 1*01                                | Undetermined     |
| 45851     | 3M-052-SE         | PBMC               | H020494 | 4-39*06             | 3-3*01,02           | 4*02                | 6.89     | 13             | IgG        | K020409 | 2-30*01                             | 1*01                                | Undetermined     |
| 45851     | 3M-052-SE         | PBMC               | H020500 | 4-59*01             | 6-13*01             | 1*01                | 4.21     | 10             | IgA        | L020324 | 5-48*01                             | 1*01                                | V3               |
| 45851     | 3M-052-SE         | PBMC               | H020498 | 5-51*01             | 3-10*01             | 5*01                | 4.15     | 13             | IgG        | L020327 | 1-50*01                             | 2*01                                | V3               |
| 45851     | 3M-052-SE         | PBMC               | H020499 | 3-43*02             | 2-8*02              | 4*02                | 5.61     | 16             | IgG        | L020326 | 6-57*01                             | 7*01                                | Undetermined     |
| 45851     | 3M-052-SE         | PBMC               | H020505 | 4-59*01             | 1-1*01              | 1*01                | 4.21     | 10             | IgM        | L020329 | 6-57*01                             | 7*01                                | V3               |
| 45851     | 3M-052-SE         | PBMC               | H020501 | 4-39*06             | 3-3*01,02           | 4*02                | 6.63     | 13             | IgG        | L020328 | 5-48*01                             | 1*01                                | V3               |
| 45851     | 3M-052-SE         | PBMC               | H020504 | 3-43*02             | 6-13*01             | 4*02                | 5.31     | 10             | IgG        | L020329 | 6-57*01                             | 7*01                                | Undetermined     |
| 45851     | 3M-052-SE         | PBMC               | H020506 | 4-39*06             | 3-3*01,02           | 1*01                | 6.38     | 13             | IgE        | L020333 | 6-57*01                             | 7*01                                | V3               |
| 45851     | 3M-052-SE         | PBMC               | H020496 | 3-43*02             | 2-8*02              | 4*02                | 5.57     | 16             | IgG        | K020407 | 2-40*01                             | 1*01                                | Undetermined     |
| 45851     | 3M-052-SE         | PBMC               | H020497 | 4-59*01             | 1-1*01              | 1*01                | 3.95     | 10             | IgG        | K020409 | 2-30*01                             | 1*01                                | V3               |

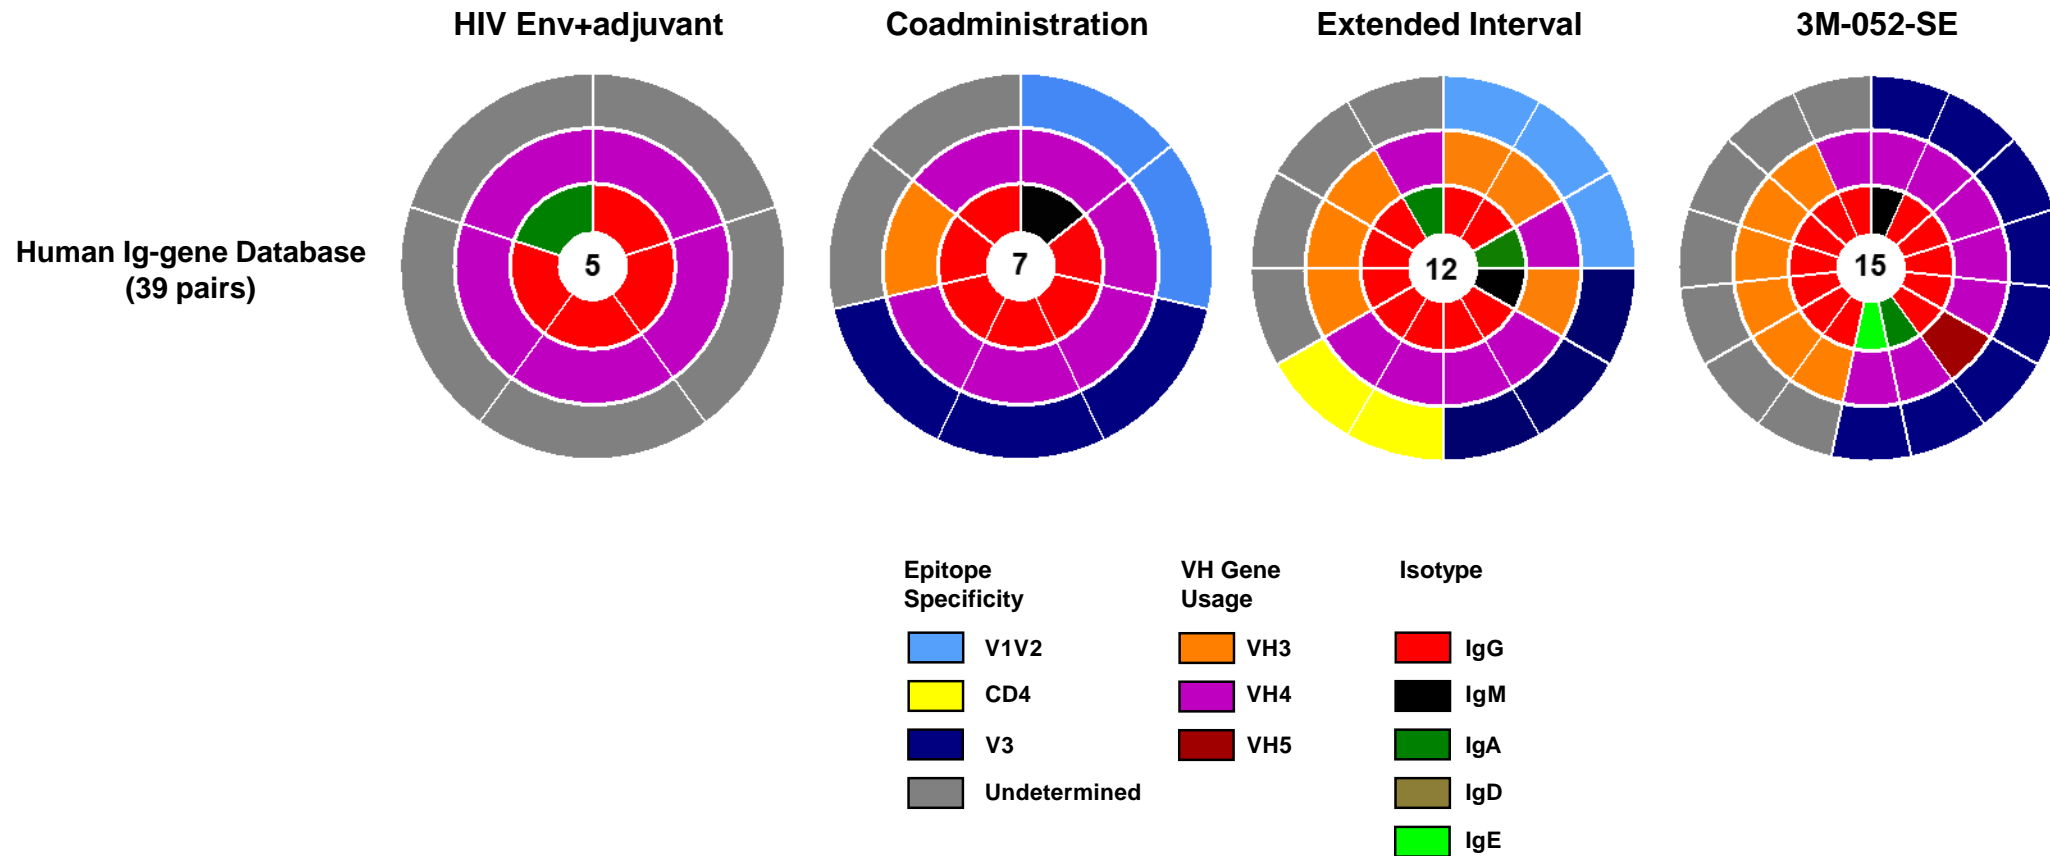

**S3 Fig. Analyses of epitope specificity and immunogenetic characteristics of the Env-specific functional heavy- and light-chains of 39 vaccine-elicited mAbs in infants using human Ig-gene database.** Initial analysis with human immunoglobulin (Ig) database indicated a total of 39 heavy- and light-chain pairs isolated from antigen-specific memory B cells across different vaccine groups. Epitope specificity, VH gene family usage, and isotype distribution of identified functional heavy- and light-chain pairs were similar across vaccine groups. Epitope specificity, VH gene family usage, and isotype distribution of identified functional heavy and light chains are displayed in concentric circles. The number of mAbs per group is displayed in the center.

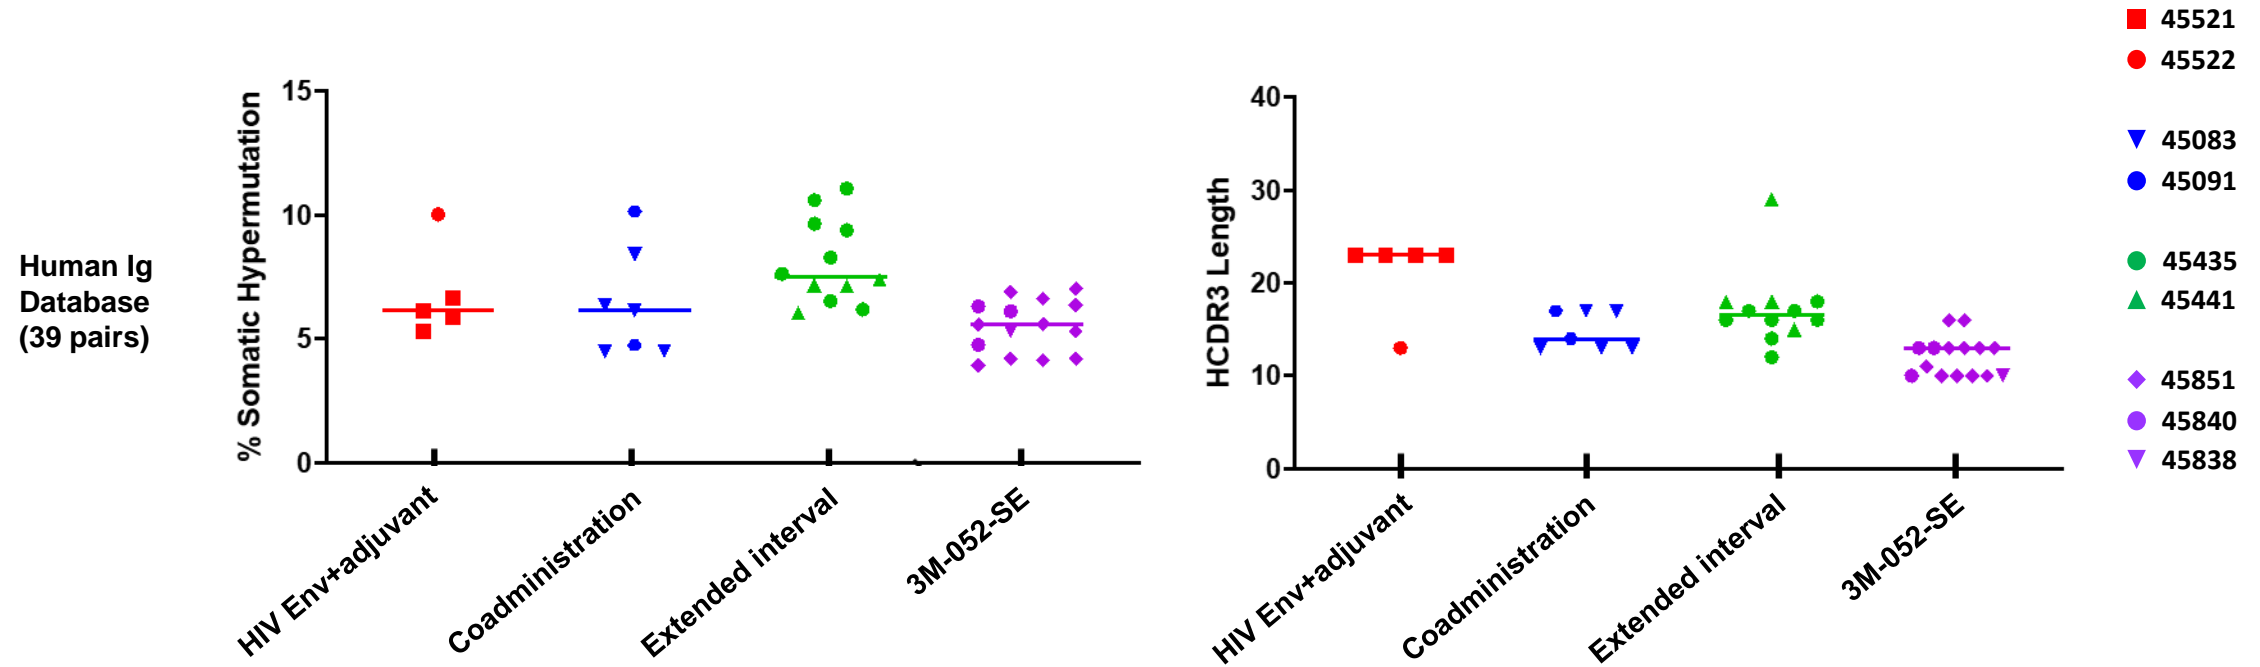

**S4 Fig. Frequency of somatic hypermutation and heavy chain complementarity-determining region 3 (HCDR3) length of vaccine-elicited Env-reactive functional heavy- and light-chains identified using rhesus Ig sequence database.** Analysis of percent somatic hypermutation frequency and HCDR3 lengths for Env-reactive heavy and light chains pairs (39 mAb pairs) from infant antigen-specific B cells based on human immunoglobulin (Ig) sequence database. Horizontal lines indicated median values of individual groups. Corresponding functional heavy and light chains isolated from individual infants are denoted by symbols.
